# Supplementary material for: Prevalence of fecal viruses and bacteriophage in Canadian farmed mink (Neovison vison)
Source: PubMed Central journal article supplement (PMC6341152; doi:10.1002/mbo3.622), 2018-04-10

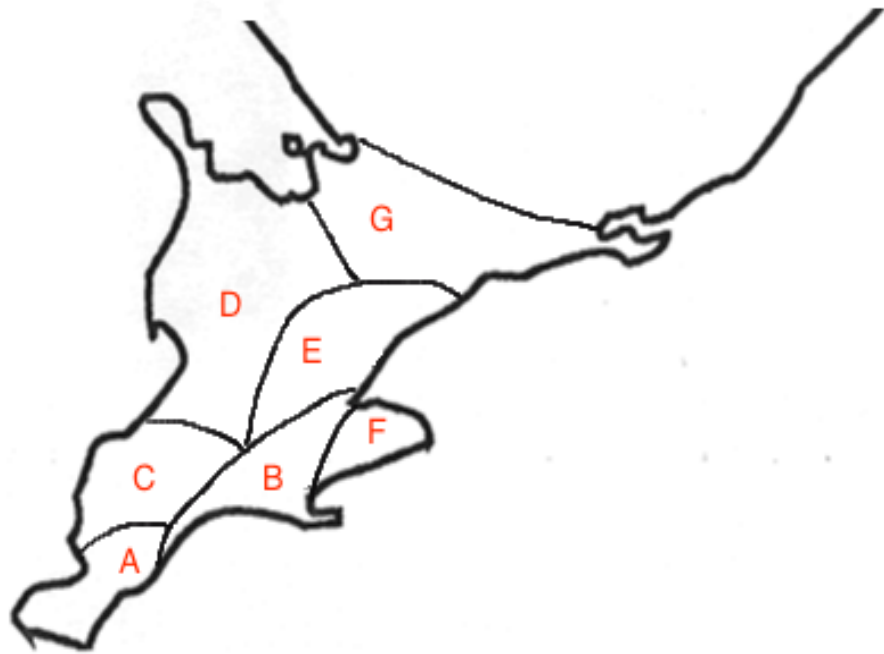

Supplement: MBO3-8-e00622-s001.pdf [file MBO3-8-e00622-s001.pdf]
